# Supplementary material
Source: Springer Nature journal article supplement (http://publikationen.ub.uni-frankfurt.de/opus4/files/34572/12977_2013_3895_MOESM4_ESM.pdf)

CD4i

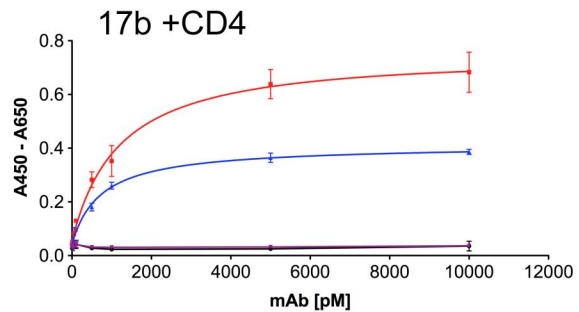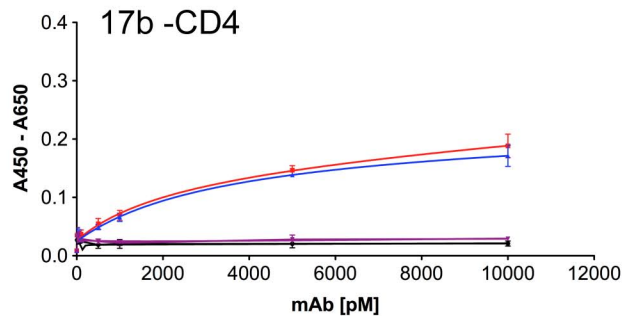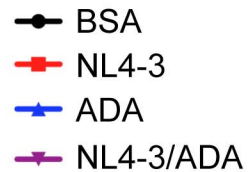

gp41

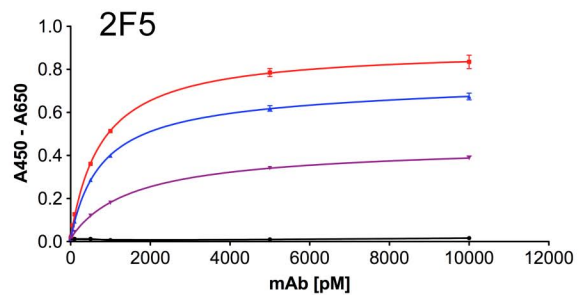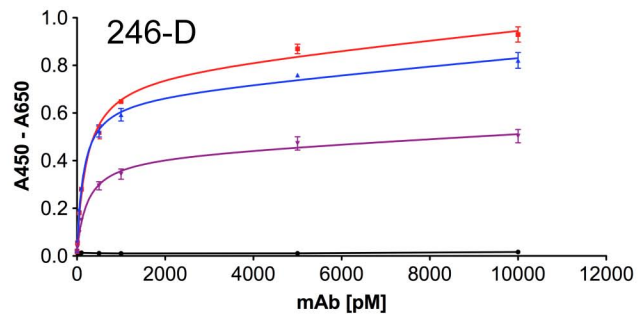

neg. control

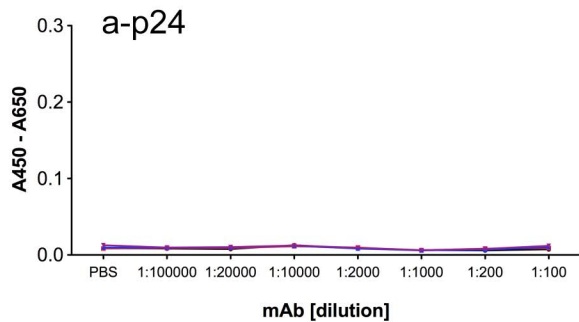

Supplement: MOESM4 [file 12977_2013_3895_MOESM4_ESM.pdf]
